# Supplementary material
Source: PubMed Central journal article supplement (PMC2567232)
Supplement: 0802217105_0802217105SI.pdf [file 0802217105_0802217105SI.pdf]

# Supporting Information

DiFranco *et al.* 10.1073/pnas.0802217105

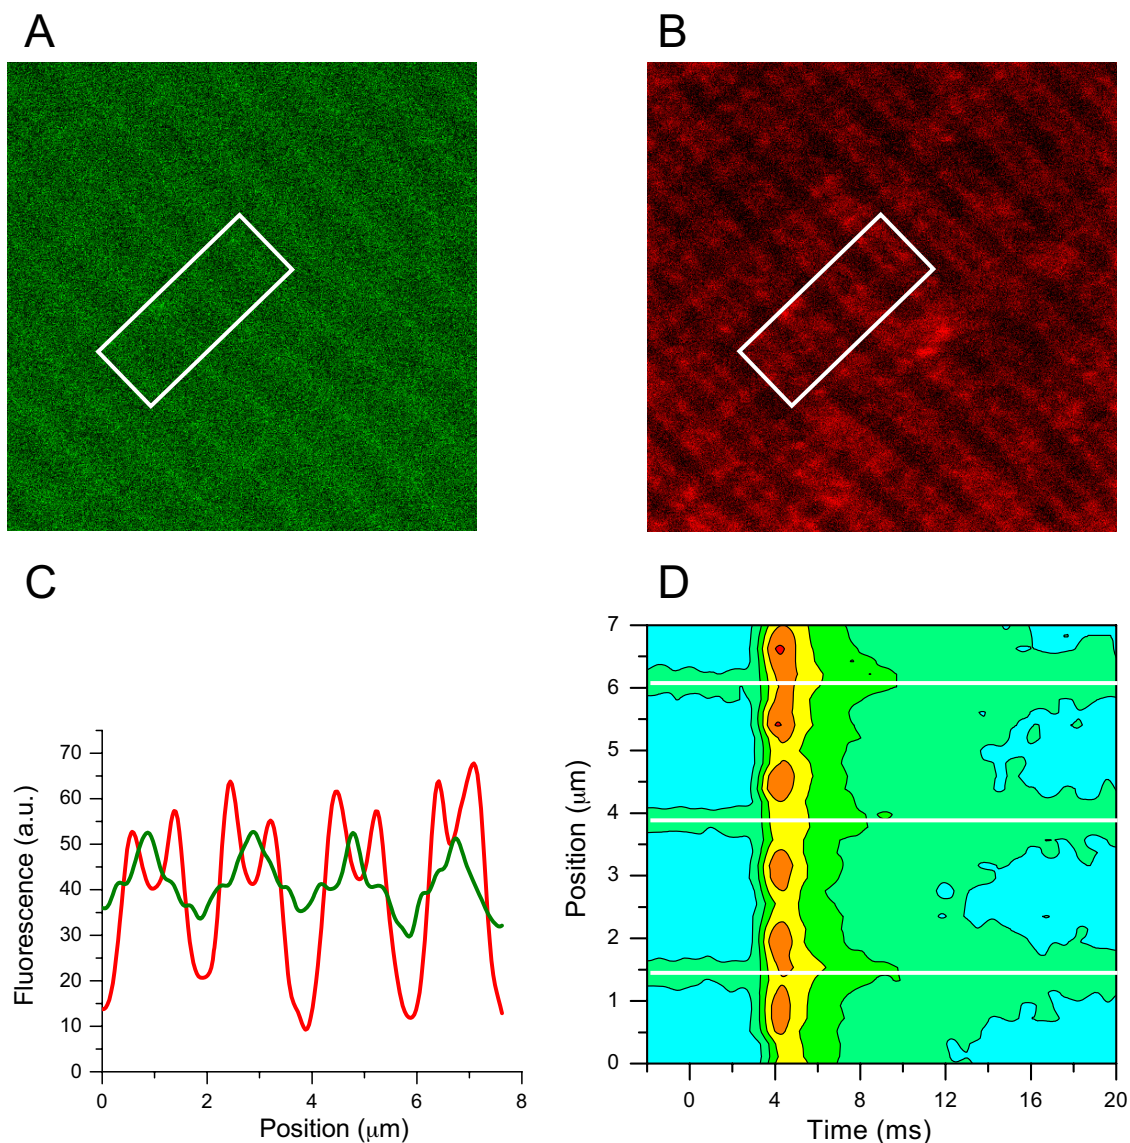

**Fig. S1.** Fluorescence imaging of the sarcomeric distribution of OGB-5N in *mdx* muscle fibers. (A and B) TPLSM fluorescence images of a quiescent muscle fiber loaded with OGB-5N and stained with di-8-ANEPPS. Note the single and double-banded staining pattern of OGB-5N (A) and di-8-ANEPPS (B), respectively. (C) Fluorescence intensity profiles obtained by pixel integration within the rectangular areas in A (green) and B (red). Note that the OGB-5N maxima are located at the midpoints of the shortest distances between consecutive di-8-ANEPPS bands (T-tubules). The length of the rectangles is 10  $\mu\text{m}$ . (D) Contour fluorescence map (in arbitrary units) obtained by longitudinally scanning (total of 7  $\mu\text{m}$ ) an *mdx* fiber loaded with OGB-5N with the spot detection system. The fiber was stimulated at  $t = 0$ . The positions of Z-lines are indicated with solid lines at the center of high fluorescence prestimulus bands.
